# Supplementary material for: Characterization of insoluble dietary fiber from three food sources and their potential hypoglycemic and hypolipidemic effects
Source: Royal Society of Chemistry journal article supplement (doi:10.1039/d1fo00521a), 2021-01-01

Supplementary Figure 1 FT-IR spectra (A), XRD patterns (B) of the ellulose, hemicelluloses, and lignin.

Supplementary Figure 1

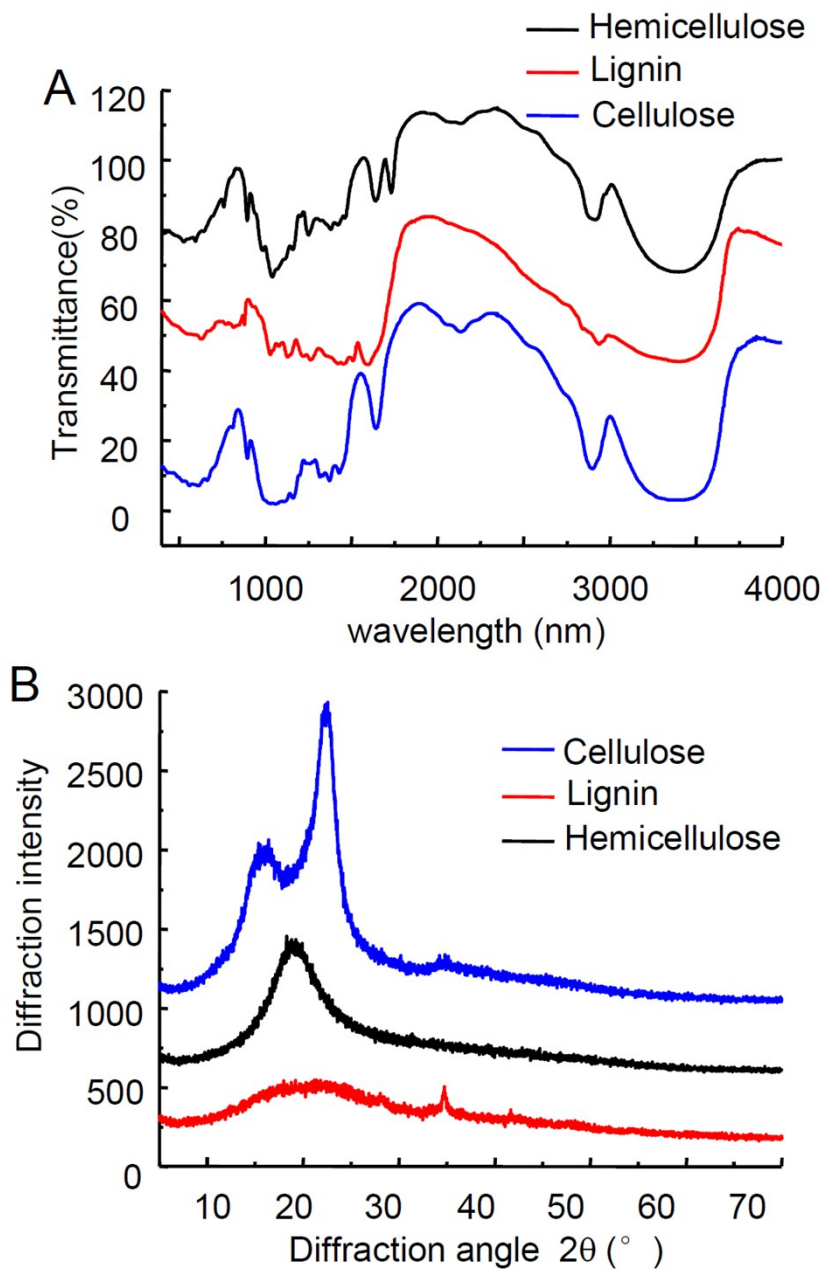

Supplement: d1fo00521a1.pdf [file d1fo00521a1.pdf]
